# Supplementary material
Source: Springer Nature journal article supplement (https://www.springermedizin.de/resource/supplementary/12885_2012_3593_MOESM1_ESM.pdf/9464160)

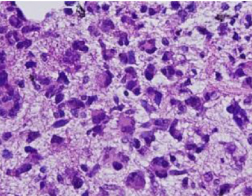

H & E stain

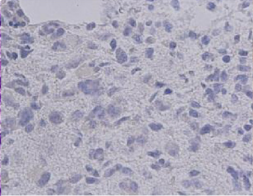

Control

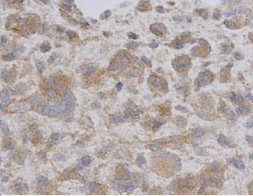

MAGE-A1

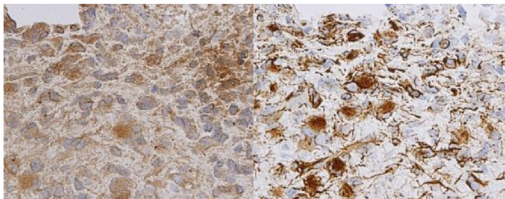

MAGE-A3

WT-1

Supplement: MOESM1 [file 9464160]
